# Supplementary material for: Effect of PKH-26-labeled exosomes derived from bone marrow mesenchymal stem cells on corneal epithelium regeneration in diabetic mice
Source: PubMed Central journal article supplement — Ann Transl Med. 2023 Feb 21;11(4):167. doi: 10.21037/atm-22-6644 (PMC10009570; doi:10.21037/atm-22-6644), 2023-02-21
Supplement: atm-11-04-167-dss.pdf [file atm-11-04-167-dss.pdf]

## Data Sharing Statement

|                     |                                                                                                                                                    |                                                            |
|---------------------|----------------------------------------------------------------------------------------------------------------------------------------------------|------------------------------------------------------------|
| <b>Article Info</b> | <a href="https://dx.doi.org/10.21037/atm-22-6644">https://dx.doi.org/10.21037/atm-22-6644</a>                                                      |                                                            |
| <b>Item</b>         | <b>Question</b>                                                                                                                                    | <b>Authors' Response<br/>(place "-" if not applicable)</b> |
| 1                   | Would you like to share data collected for your study to others?                                                                                   | No.                                                        |
| 2                   | If not, would you like to share the reason for your decision?                                                                                      | Our research is not over yet, and further work is needed.  |
| 3                   | What data in particular will be shared?                                                                                                            | -                                                          |
| 4                   | Any other documents will be share? Such as study protocol, statistical analysis plan, informed consent form, clinical study report, analytic code. | -                                                          |
| 5                   | When will data availability begin?                                                                                                                 | -                                                          |
| 6                   | When will data availability end?                                                                                                                   | -                                                          |
| 7                   | To whom will you share the data?                                                                                                                   | -                                                          |
| 8                   | For what type of analysis or purpose?                                                                                                              | -                                                          |
| 9                   | How or where can the data/documents be obtained?                                                                                                   | -                                                          |
| 10                  | Any other restrictions?                                                                                                                            | -                                                          |
